# Supplementary material for: Improving the Activity of Tryptophan Synthetase via a Nucleic Acid Scaffold
Source: MDPI journal article supplement (doi:10.3390/molecules28217272), 2023-10-26
Supplement: s1 [file s1]

dCE2

SKRNKPGKATGKGKPVGDKWLDDAGKDSGAPIPDRIADKLRDKEFKNFDD  
FRKKFWEEVSKDPDLKQFKGSNKTNIQKGKAPFARKKDQVGGRRERFELN  
HDKPISQDGGVYDMNNIRVTTPKRNIDIERGK

dCE7

SKRNKPGKATGKGKPVNNKWLNNAGKDLGSPVPDRIANKLRDKEFKSFDD  
FRKKFWEEVSKDPELSKQFSRNNNDRMKVGKAPKTRTQDVSGKRTSFELN  
HEKPISQNGGVYDMDNISVVTPKRNIDIERGK

dCE8

SKRNKPGKATGKGKPVGDKWLDDAGKDSGAPIPDRIADKLRDKEFKNFDD  
FRRKFWEVSKDPELSKQFNPNGNKKRLSQGLAPRARNKDTVGGRRSFELN  
HDKPISQDGGVYDMDNLRITTPKRNIDIERGQ

dCE9

SKRNKPGKATGKGKPVGDKWLDDAGKDSGAPIPDRIADKLRDKEFKSFDD  
FRKAVWEEVSKDPELSKNLNPSNKSSVSKGYSPFTPKNQQVGGGRKVYELN  
HDKPISQGGEVYDMDNIRVTTPKRNIDIERGK

TrapA

MERYESLFAQLKERKEGAFVPFVTLGDPGIEQSLKIIDTLIEAGADALELGIPFS  
DPLADGPTIQNATLRAFAAGVTPAQCFEMLALIRQKHPTIPIGLLMYANLVFNK  
GIDEFYAQCEKVGVDVSVLVADVPVEESAPFRQAALRHNVAPIFICPPNADDDL  
RQIASYGRGYTYLLSRAGVTGAENRAALPLNHLVAKLKEYNAAPPLQGFGIS  
APDQVKAIDAGAAGAISGSAIVKIIIEQHINEPEKMLAALKVFVQPMKAATRS

TrapB

TTLLNPYFGEFGGMYVPQILMPALRQLEEFVSAQKDPEFQAQFNDLLKNYA  
GRPTALTKCQNITAGTNTTLYLKREDLLHGGAHKTNQVLGQALLAKRMGKTE  
IIAETGAGQHGVASALASALLGLKCRIYMGAKDVERQSPNVFRMLMGAEVI  
PVHSGSATLKDACNEALRDWSGSYETAHYMLGTAAGPHPYPTIVREFQRMIG  
EETKAQILEREGRLPDAVIACVGGGSNAIGMFADFINETNVGLIGVEPGGHGIE  
TGEHGAPLKHGRVGIYFGMKAPMMQTEDGQIEESYSISAGLDFPSVGPQHAY  
LNSTGRADYVSITDDEALEAFKTLCLHEGIIPALESSHALAHALKMMRENPK  
EQLLVVNLSGRGDKDIFTVHDILKARGEI
